# Supplementary material
Source: PubMed Central journal article supplement (PMC7508596)
Supplement: AAC.00735-20-s0001.pdf [file AAC.00735-20-s0001.pdf]

Figure S1

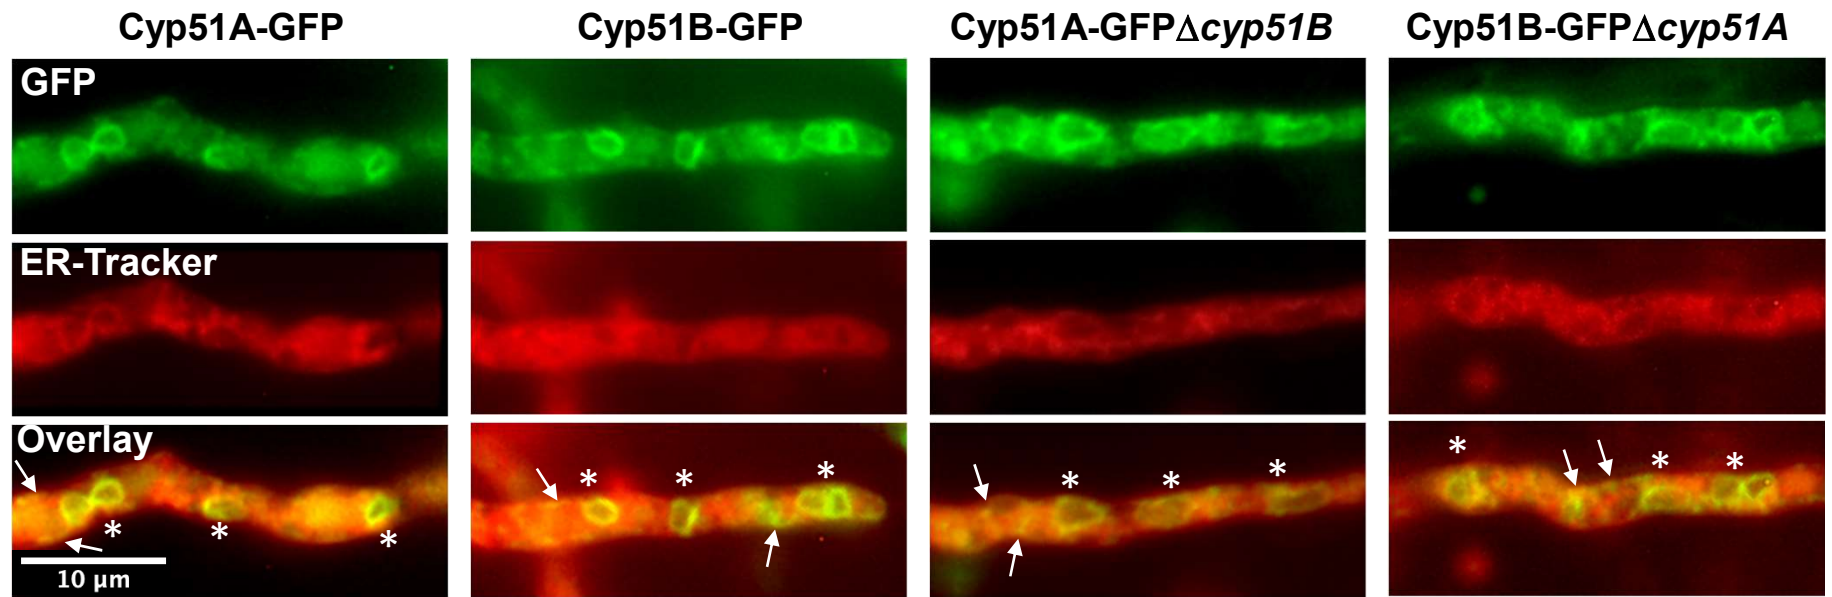

**Figure S1. Localization of Cyp51A and Cyp51B proteins to endoplasmic reticulum (ER).** Hyphae of strains expressing GFP-labeled Cyp51A or Cyp51B protein in either wild-type or *cyp51B* or *cyp51A* deletion backgrounds were examined via fluorescence microscopy of 24 h live-cell liquid GMM cultures in glass-bottomed Petri dishes. Hyphae were stained with ER-Tracker Red (ThermoFisher) by addition of dye to the culture medium to a final concentration of 1 μM. Green fluorescence in GFP panels indicates localization of GFP-labeled Cyp51A or Cyp51B proteins in either wild-type or deletion backgrounds, as indicated. Red fluorescence in ER-Tracker panels indicates ER staining. Yellow coloration in Overlay panels indicates co-localization of Cyp51A and Cyp51B proteins with ER. Note the overlap of GFP fluorescence and ER-Tracker Red stain in the perinuclear ER and some parts of the peripheral ER indicated by asterisks and white arrows, respectively. Scale bar is 10 μm.
